# Supplementary material for: Catastrophic health expenditure: a comparative analysis of empty-nest and non-empty-nest households with seniors in Shandong, China
Source: PubMed Central journal article supplement — BMJ Open. 2016 Jul 5;6(7):e010992. doi: 10.1136/bmjopen-2015-010992 (PMC4947795; doi:10.1136/bmjopen-2015-010992), 2016-07-05
Supplement: bmjopen-2015-010992supp_tables.pdf [file bmjopen-2015-010992supp_tables.pdf]

**Supplementary Table 1.** Health outcomes between empty-nest households from no children and departed children in Shandong, China

| Health outcomes                                         | Empty-nest households |                      | $\chi^2$ | P     |
|---------------------------------------------------------|-----------------------|----------------------|----------|-------|
|                                                         | No children (%)       | Departed children(%) |          |       |
| <b>One or more elderly members with NCDs</b>            |                       |                      | 0.020    | 0.889 |
| Yes                                                     | 35(68.6)              | 1087(69.5)           |          |       |
| No                                                      | 16(31.4)              | 476(30.5)            |          |       |
| <b>One or more elderly members admitted to hospital</b> |                       |                      | 2.411    | 0.120 |
| Yes                                                     | 5(9.8)                | 286(18.3)            |          |       |
| No                                                      | 46(90.2)              | 1277(81.7)           |          |       |
| <b>Total</b>                                            | 51                    | 1563                 |          |       |

**Supplementary Table 2.** Descriptive statistics of sample households and prevalence of CHE <sup>a</sup> in different study sites of Shandong, China

| Characteristic                                            | Urban areas <sup>b</sup> |        |        | Rural areas <sup>c</sup> |           |           | All (%) |
|-----------------------------------------------------------|--------------------------|--------|--------|--------------------------|-----------|-----------|---------|
|                                                           | DC (%)                   | HY (%) | ZD (%) | QF (%)                   | CP (%)    | LL (%)    |         |
| <b>Observations</b>                                       | 495                      | 460    | 477    | 478                      | 396       | 455       | 2761    |
| <b>Household composition</b>                              |                          |        |        |                          |           |           |         |
| Empty-nest single                                         | 9.6                      | 12.5   | 16.6   | 14.6                     | 20.7(2.2) | 13.6(1.6) | 14.9    |
| Empty-nest couple                                         | 40.1                     | 45.5   | 54.2   | 34.0                     | 49.2(2.8) | 44.2(2.3) | 44.2    |
| Non-empty-nest elderly                                    | 50.4                     | 42.1   | 29.2   | 51.3(2.4)                | 30.1(2.6) | 42.2(2.3) | 40.9    |
| <b>One or more elderly members with NCDs <sup>d</sup></b> |                          |        |        |                          |           |           |         |
| Yes                                                       | 66.3                     | 62.9   | 79.8   | 62.6                     | 64.2      | 70.2      | 63.4    |
| No                                                        | 33.7                     | 37.1   | 20.2   | 37.4                     | 35.8      | 29.8      | 32.6    |
| <b>One or more elderly members admitted to hospital</b>   |                          |        |        |                          |           |           |         |
| Yes                                                       | 15.7                     | 20.6   | 22.1   | 11.1                     | 19.0      | 8.5       | 15.7    |
| No                                                        | 84.3                     | 79.4   | 77.9   | 88.9                     | 81.0      | 91.5      | 84.3    |
| <b>CHE</b>                                                |                          |        |        |                          |           |           |         |
| Yes                                                       | 35.8                     | 43.1   | 51.2   | 41.2                     | 54.6      | 48.8      | 46.1    |
| No                                                        | 64.2                     | 56.9   | 48.8   | 58.8                     | 45.4      | 51.2      | 53.9    |

a. CHE: Catastrophic health expenditure.

b. DC: Dongchangfu District; HY: Huaiyin District; ZD: Zhangdian District.

c. QF: Qufu County; CP: Chiping County; LL: Leling County.

d. NCD: Non-communicable chronic disease.

**Supplementary Table 3.** Health outcomes and household income among different types of elderly households in Shandong, China

| <b>Variables</b>                                        | <b>Empty-nest<br/>singles (%)</b> | <b>Empty-nest<br/>couples (%)</b> | <b>Non-empty-nest<br/>elderly (%)</b> | $\chi^2$ | <b><i>P</i></b> |
|---------------------------------------------------------|-----------------------------------|-----------------------------------|---------------------------------------|----------|-----------------|
| <b>Observations</b>                                     | 398                               | 1216                              | 1147                                  |          |                 |
| <b>Household income</b>                                 |                                   |                                   |                                       | 314.5    | <b>0.000</b>    |
| Q1                                                      | 211 (53.6)                        | 285 (23.6)                        | 151 (13.3)                            |          |                 |
| Q2                                                      | 100 (25.4)                        | 324 (26.8)                        | 279 (24.6)                            |          |                 |
| Q3                                                      | 66 (16.8)                         | 281 (23.2)                        | 351 (30.9)                            |          |                 |
| Q4                                                      | 17 (4.3)                          | 320 (26.4)                        | 355 (31.2)                            |          |                 |
| <b>One or more elderly members with NCD</b>             |                                   |                                   |                                       | 16.69    | <b>0.000</b>    |
| Yes                                                     | 300 (75.4)                        | 822 (67.6)                        | 737 (64.3)                            |          |                 |
| No                                                      | 98 (24.6)                         | 394 (32.4)                        | 410 (35.7)                            |          |                 |
| <b>One or more elderly members admitted to hospital</b> |                                   |                                   |                                       | 10.51    | <b>0.005</b>    |
| Yes                                                     | 72 (18.1)                         | 219 (18.0)                        | 154 (13.4)                            |          |                 |
| No                                                      | 326 (81.9)                        | 997 (82.0)                        | 993 (86.6)                            |          |                 |
